# Supplementary material
Source: Springer Nature journal article supplement (https://www.springermedizin.de/resource/supplementary/12902_2012_161_MOESM3_ESM.pdf/9515782)

## A) MEN

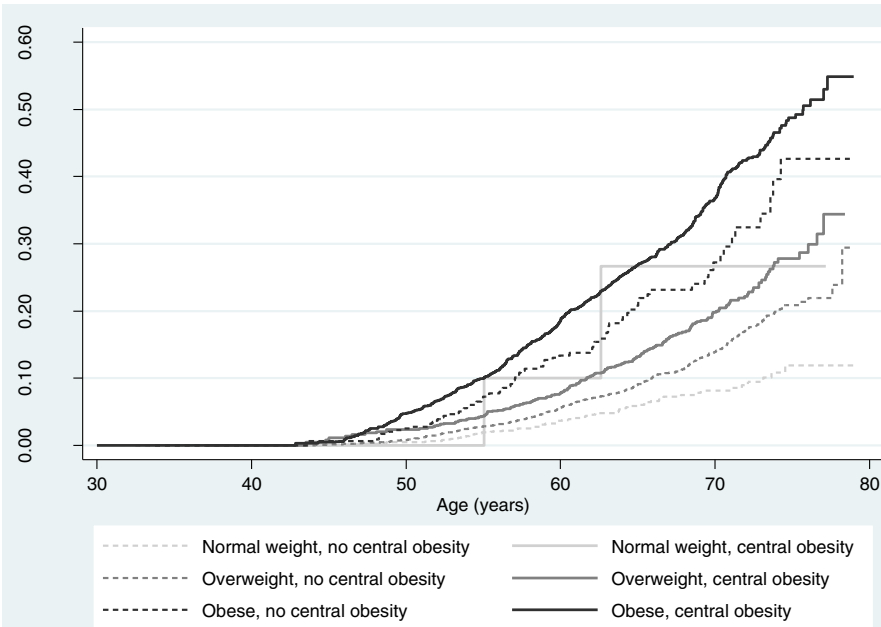

## B) WOMEN

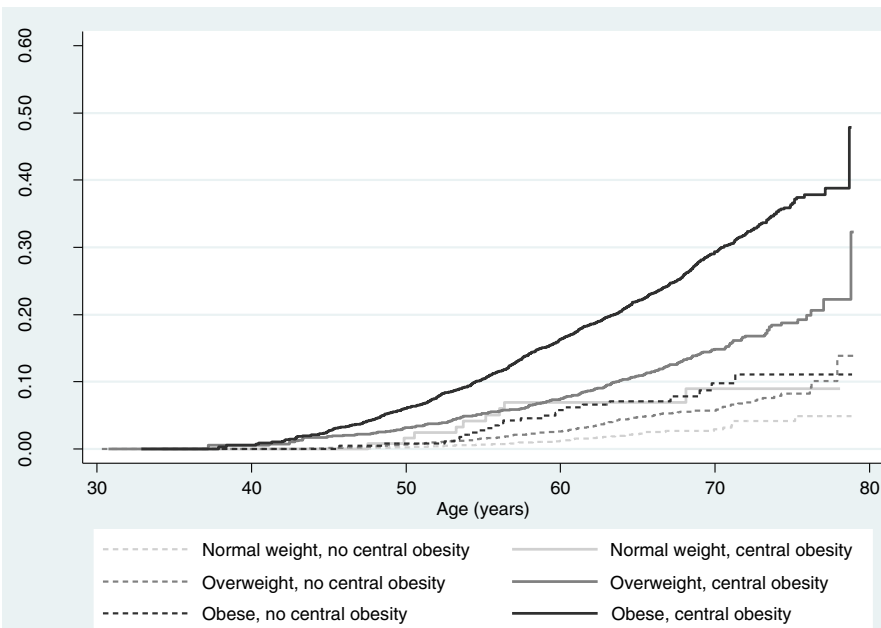

Supplement: MOESM3 [file 9515782]
